# Supplementary material for: Multichart Schemes for Detecting Changes in Disease Incidence
Source: Comput Math Methods Med. 2020 May 15;2020:7267801. doi: 10.1155/2020/7267801 (PMC7245694; doi:10.1155/2020/7267801)
Supplement: Supplementary Materials — Real data to support simulation studies for subsection 3.2. [file 7267801.f1.xlsx]

## Sheet: Sheet1
Serial	TB Arthritis	TB Meningitis	TB Miliary
1	13	8	9
2	13	16	16
3	15	9	13
4	7	10	17
5	7	8	17
6	8	16	9
7	11	18	15
8	15	10	8
9	16	12	10
10	11	18	13
11	9	13	8
12	11	11	5
13	12	5	7
14	11	15	18
15	15	7	15
16	8	8	16
17	9	10	17
18	5	15	6
19	13	17	13
20	16	8	7
21	18	12	9
22	10	20	12
23	7	14	5
24	14	9	3
25	10	6	15
26	16	5	16
27	17	12	14
28	20	16	30
29	14	15	14
30	12	19	11
31	8	18	7
32	7	9	5
33	12	13	15
34	21	15	11
35	11	19	9
36	7	20	5
37	7	9	12
38	13	15	8
39	23	18	13
40	14	11	18
41	15	9	12
42	12	7	11
43	16	21	9
44	19	15	13
45	18	17	16
46	16	20	17
47	13	21	15
48	10	15	3
49	4	12	10
50	10	18	19
51	17	11	15
52	8	7	8
53	15	2	5
54	19	10	15
55	17	11	19
56	2	9	11
57	5	15	20
58	3	8	7
59	7	3	2
60	4	7	5
61	2	2	3
62	8	6	2
63	2	3	5
64	4	3	2
65	2	2	5
66	4	6	7
67	3	2	9
68	15	3	4
69	5	11	2
70	9	9	3
71	13	3	5
72	10	4	3
73	2	3	7
74	5	11	4
75	2	2	7
76	2	2	12
77	3	4	15
78	5	6	17
79	4	3	11
80	3	12	2
81	11	16	5
82	15	11	2
83	18	5	8
84	20	9	6
85	3	4	4
86	4	2	7
87	12	7	5
88	2	6	12
89	2	3	13
90	16	2	4
91	10	12	6
92	5	6	19
93	3	10	10
94	2	3	11
95	4	6	4
96	5	4	8

## Sheet: Sheet3
Serial	TB Arthritis	TB Meningitis	TB Miliary
1	13	8	9	1.3123	0.808421	0.907563	1.3123	0.808421	0.907563
2	13	16	16	1.3123	1.61684	1.61345	1.3123	1.61684	1.61345
3	15	9	13	1.5142	0.909474	1.31092	1.5142	0.909474	1.31092
4	7	10	17	0.706625	1.01053	1.71429	0.706625	1.01053	1.71429
5	7	8	17	0.706625	0.808421	1.71429	0.706625	0.808421	1.71429
6	8	16	9	0.807571	1.61684	0.907563	0.807571	1.61684	0.907563
7	11	18	15	1.11041	1.81895	1.51261	1.11041	1.81895	1.51261
8	15	10	8	1.5142	1.01053	0.806723	1.5142	1.01053	0.806723
9	16	12	10	1.61514	1.21263	1.0084	1.61514	1.21263	1.0084
10	11	18	13	1.11041	1.81895	1.31092	1.11041	1.81895	1.31092
11	9	13	8	0.908517	1.31368	0.806723	0.908517	1.31368	0.806723
12	11	11	5	1.11041	1.11158	0.504202	1.11041	1.11158	0.504202
13	12	5	7	1.21136	0.505263	0.705882	1.21136	0.505263	0.705882
14	11	15	18	1.11041	1.51579	1.81513	1.11041	1.51579	1.81513
15	15	7	15	1.5142	0.707368	1.51261	1.5142	0.707368	1.51261
16	8	8	16	0.807571	0.808421	1.61345	0.807571	0.808421	1.61345
17	9	10	17	0.908517	1.01053	1.71429	0.908517	1.01053	1.71429
18	5	15	6	0.504732	1.51579	0.605042	0.504732	1.51579	0.605042
19	13	17	13	1.3123	1.71789	1.31092	1.3123	1.71789	1.31092
20	16	8	7	1.61514	0.808421	0.705882	1.61514	0.808421	0.705882
21	18	12	9	1.81703	1.21263	0.907563	1.81703	1.21263	0.907563
22	10	20	12	1.00946	2.02105	1.21008	1.00946	2.02105	1.21008
23	7	14	5	0.706625	1.41474	0.504202	0.706625	1.41474	0.504202
24	14	9	3	1.41325	0.909474	0.302521	1.41325	0.909474	0.302521
25	10	6	15	1.00946	0.606316	1.51261	1.00946	0.606316	1.51261
26	16	5	16	1.61514	0.505263	1.61345	1.61514	0.505263	1.61345
27	17	12	14	1.71609	1.21263	1.41176	1.71609	1.21263	1.41176
28	20	16	30	2.01893	1.61684	3.02521	2.01893	1.61684	3.02521
29	14	15	14	1.41325	1.51579	1.41176	1.41325	1.51579	1.41176
30	12	19	11	1.21136	1.92	1.10924	1.21136	1.92	1.10924
31	8	18	7	0.807571	1.81895	0.705882	0.807571	1.81895	0.705882
32	7	9	5	0.706625	0.909474	0.504202	0.706625	0.909474	0.504202
33	12	13	15	1.21136	1.31368	1.51261	1.21136	1.31368	1.51261
34	21	15	11	2.11987	1.51579	1.10924	2.11987	1.51579	1.10924
35	11	19	9	1.11041	1.92	0.907563	1.11041	1.92	0.907563
36	7	20	5	0.706625	2.02105	0.504202	0.706625	2.02105	0.504202
37	7	9	12	0.706625	0.909474	1.21008	0.706625	0.909474	1.21008
38	13	15	8	1.3123	1.51579	0.806723	1.3123	1.51579	0.806723
39	23	18	13	2.32177	1.81895	1.31092	2.32177	1.81895	1.31092
40	14	11	18	1.41325	1.11158	1.81513	1.41325	1.11158	1.81513
41	15	9	12	1.5142	0.909474	1.21008	1.5142	0.909474	1.21008
42	12	7	11	1.21136	0.707368	1.10924	1.21136	0.707368	1.10924
43	16	21	9	1.61514	2.12211	0.907563	1.61514	2.12211	0.907563
44	19	15	13	1.91798	1.51579	1.31092	1.91798	1.51579	1.31092
45	18	17	16	1.81703	1.71789	1.61345	1.81703	1.71789	1.61345
46	16	20	17	1.61514	2.02105	1.71429	1.61514	2.02105	1.71429
47	13	21	15	1.3123	2.12211	1.51261	1.3123	2.12211	1.51261
48	10	15	3	1.00946	1.51579	0.302521	1.00946	1.51579	0.302521
49	4	12	10	0.403785	1.21263	1.0084	0.403785	1.21263	1.0084
50	10	18	19	1.00946	1.81895	1.91597	1.00946	1.81895	1.91597
51	17	11	15	1.71609	1.11158	1.51261	1.71609	1.11158	1.51261
52	8	7	8	0.807571	0.707368	0.806723	0.807571	0.707368	0.806723
53	15	2	5	1.5142	0.202105	0.504202	1.5142	0.202105	0.504202
54	19	10	15	1.91798	1.01053	1.51261	1.91798	1.01053	1.51261
55	17	11	19	1.71609	1.11158	1.91597	1.71609	1.11158	1.91597
56	2	9	11	0.201893	0.909474	1.10924	0.201893	0.909474	1.10924
57	5	15	20	0.504732	1.51579	2.01681	0.504732	1.51579	2.01681
58	3	8	7	0.302839	0.808421	0.705882	0.302839	0.808421	0.705882
59	7	3	2	0.706625	0.303158	0.201681	0.706625	0.303158	0.201681
60	4	7	5	0.403785	0.707368	0.504202	0.403785	0.707368	0.504202
61	2	2	3	0.201893	0.202105	0.302521	0.201893	0.202105	0.302521
62	8	6	2	0.807571	0.606316	0.201681	0.807571	0.606316	0.201681
63	2	3	5	0.201893	0.303158	0.504202	0.201893	0.303158	0.504202
64	4	3	2	0.403785	0.303158	0.201681	0.403785	0.303158	0.201681
65	2	2	5	0.201893	0.202105	0.504202	0.201893	0.202105	0.504202
66	4	6	7	0.403785	0.606316	0.705882	0.403785	0.606316	0.705882
67	3	2	9	0.302839	0.202105	0.907563	0.302839	0.202105	0.907563
68	15	3	4	1.5142	0.303158	0.403361	1.5142	0.303158	0.403361
69	5	11	2	0.504732	1.11158	0.201681	0.504732	1.11158	0.201681
70	9	9	3	0.908517	0.909474	0.302521	0.908517	0.909474	0.302521
71	13	3	5	1.3123	0.303158	0.504202	1.3123	0.303158	0.504202
72	10	4	3	1.00946	0.404211	0.302521	1.00946	0.404211	0.302521
73	2	3	7	0.201893	0.303158	0.705882	0.201893	0.303158	0.705882
74	5	11	4	0.504732	1.11158	0.403361	0.504732	1.11158	0.403361
75	2	2	7	0.201893	0.202105	0.705882	0.201893	0.202105	0.705882
76	2	2	12	0.201893	0.202105	1.21008	0.201893	0.202105	1.21008
77	3	4	15	0.302839	0.404211	1.51261	0.302839	0.404211	1.51261
78	5	6	17	0.504732	0.606316	1.71429	0.504732	0.606316	1.71429
79	4	3	11	0.403785	0.303158	1.10924	0.403785	0.303158	1.10924
80	3	12	2	0.302839	1.21263	0.201681	0.302839	1.21263	0.201681
81	11	16	5	1.11041	1.61684	0.504202	1.11041	1.61684	0.504202
82	15	11	2	1.5142	1.11158	0.201681	1.5142	1.11158	0.201681
83	18	5	8	1.81703	0.505263	0.806723	1.81703	0.505263	0.806723
84	20	9	6	2.01893	0.909474	0.605042	2.01893	0.909474	0.605042
85	3	4	4	0.302839	0.404211	0.403361	0.302839	0.404211	0.403361
86	4	2	7	0.403785	0.202105	0.705882	0.403785	0.202105	0.705882
87	12	7	5	1.21136	0.707368	0.504202	1.21136	0.707368	0.504202
88	2	6	12	0.201893	0.606316	1.21008	0.201893	0.606316	1.21008
89	2	3	13	0.201893	0.303158	1.31092	0.201893	0.303158	1.31092
90	16	2	4	1.61514	0.202105	0.403361	1.61514	0.202105	0.403361
91	10	12	6	1.00946	1.21263	0.605042	1.00946	1.21263	0.605042
92	5	6	19	0.504732	0.606316	1.91597	0.504732	0.606316	1.91597
93	3	10	10	0.302839	1.01053	1.0084	0.302839	1.01053	1.0084
94	2	3	11	0.201893	0.303158	1.10924	0.201893	0.303158	1.10924
95	4	6	4	0.403785	0.606316	0.403361	0.403785	0.606316	0.403361
96	5	4	8	0.504732	0.404211	0.806723	0.504732	0.404211	0.806723
	9.90625	9.89583	9.91667				1	1	1
	9.90625	9.89583	9.91667				0.317092	0.310322	0.300282
